# Supplementary material for: A pilot study of eDNA metabarcoding to estimate plant biodiversity by an alpine glacier core (Adamello glacier, North Italy)
Source: PubMed Central journal article supplement (PMC7807053; doi:10.1038/s41598-020-79738-5), 2021-01-13

## Supplementary information

### **A pilot study of eDNA metabarcoding to estimate plant biodiversity by an alpine glacier core (Adamello glacier, North Italy)**

Claudio Varotto<sup>1</sup>, Massimo Pindo<sup>1</sup>, Elena Bertoni<sup>2</sup>, Christian Casarotto<sup>3</sup>, Federica Camin<sup>1</sup>, Matteo Girardi<sup>1</sup>, Valter Maggi<sup>4</sup>, Antonella Cristofori<sup>1,\*</sup>

<sup>1</sup>Research and Innovation Centre, Fondazione Edmund Mach, San Michele all'Adige (TN), Italy

<sup>2</sup>Uppsala University, Uppsala, Sweden

<sup>3</sup>Geology department, Science Museum (MUSE), Trento, Italy

<sup>4</sup>Earth and Environmental Sciences, University of Milano Bicocca, Milano, Italy

\*Corresponding author: [antonella.cristofori@fmach.it](mailto:antonella.cristofori@fmach.it)

**Supplementary TableS1.** Sequencing results per taxa of the six samples (P1-P6, referring to different depths of the ice core), in terms of filtered reads. Total # of raw reads and OTUs per sample is also reported.

| Taxa                                                        | PI1   | PI2   | PI3   | PI4   | PI5   | PI6   |   |
|-------------------------------------------------------------|-------|-------|-------|-------|-------|-------|---|
| <i>Agrostis capillaris</i>                                  | 0     | 0     | 0     | 0     | 0     | 0     | 2 |
| Asteraceae                                                  | 0     | 0     | 0     | 0     | 3327  | 0     | 0 |
| <i>Betula pendula</i>                                       | 88    | 0     | 0     | 0     | 0     | 0     | 0 |
| Betulaceae                                                  | 0     | 0     | 0     | 0     | 0     | 12    | 0 |
| <i>Carpinus/Corylus/Ostrya</i>                              | 0     | 1     | 1     | 0     | 0     | 2384  | 1 |
| <i>Elymus caninus/E. repens</i>                             | 0     | 0     | 3831  | 8     | 0     | 0     | 0 |
| <i>Eritrichium nanum</i>                                    | 0     | 0     | 0     | 4     | 0     | 0     | 0 |
| <i>F. ornus/F. excelsior/Olea europaea/Syringa vulgaris</i> | 2     | 0     | 0     | 11    | 0     | 0     | 0 |
| Fabaceae                                                    | 1128  | 10470 | 10385 | 381   | 12068 | 4476  |   |
| Fagaceae                                                    | 0     | 1     | 0     | 2697  | 0     | 0     | 0 |
| <i>Festuca rubra/Trisetum spicatum/others</i>               | 0     | 0     | 5     | 0     | 0     | 0     | 0 |
| <i>Ficus carica</i>                                         | 0     | 1370  | 0     | 0     | 0     | 0     | 0 |
| <i>Hedera helix</i>                                         | 27    | 0     | 0     | 4     | 0     | 0     | 0 |
| <i>Juglans regia</i>                                        | 0     | 0     | 2     | 0     | 0     | 6612  |   |
| <i>Laburnum anagyroides</i>                                 | 0     | 0     | 0     | 36    | 34    | 0     | 0 |
| <i>Larix decidua</i>                                        | 0     | 1     | 0     | 0     | 2     | 10    |   |
| <i>Lonicera *</i>                                           | 3209  | 0     | 0     | 4418  | 0     | 0     | 0 |
| <i>Picea abies</i>                                          | 2897  | 0     | 0     | 1     | 224   | 12    |   |
| Pinaceae                                                    | 220   | 36    | 52    | 19    | 137   | 35    |   |
| <i>Pinus mugo</i>                                           | 18715 | 4115  | 5357  | 1312  | 12161 | 3197  |   |
| <i>Pisum sativum</i>                                        | 0     | 0     | 1     | 0     | 17    | 0     |   |
| <i>Poa annua</i>                                            | 0     | 0     | 0     | 0     | 0     | 13    |   |
| <i>Poa badensis</i>                                         | 0     | 0     | 0     | 0     | 0     | 1700  |   |
| <i>Poa pratensis</i>                                        | 0     | 0     | 513   | 1887  | 7     | 0     |   |
| Poaceae                                                     | 0     | 0     | 10    | 13    | 2152  | 12    |   |
| <i>Prunus armeniaca</i>                                     | 0     | 0     | 0     | 0     | 0     | 3891  |   |
| Rosaceae                                                    | 0     | 0     | 0     | 0     | 0     | 4     |   |
| <i>Rubus caesius</i>                                        | 0     | 0     | 0     | 0     | 0     | 1666  |   |
| <i>Setaria verticillata</i>                                 | 1407  | 0     | 0     | 0     | 464   | 0     |   |
| <i>Taraxacum *</i>                                          | 0     | 0     | 0     | 810   | 0     | 1     |   |
| <i>Trigonella caerulea</i>                                  | 0     | 0     | 3609  | 0     | 1846  | 0     |   |
| <i>Ulmus glabra</i>                                         | 0     | 0     | 0     | 4     | 0     | 0     |   |
| Urticaceae                                                  | 0     | 3     | 0     | 0     | 0     | 0     |   |
| <i>Vicia cracca</i>                                         | 0     | 0     | 3     | 1     | 17    | 0     |   |
| Unclassified                                                | 58    | 6     | 8     | 4629  | 3635  | 5882  |   |
| Total # of filtered reads                                   | 27751 | 16003 | 23777 | 19562 | 35160 | 27514 |   |
| Total # of raw reads                                        | 33289 | 31735 | 28523 | 23205 | 40091 | 33185 |   |
| Total # of OTUs                                             | 735   | 647   | 852   | 452   | 1047  | 793   |   |

\*Deposited sequence could not be verified by GeneBank, because it lacks annotation

**Supplementary Table S2.** List of taxa (different taxonomic ranks) with metabarcoding (eDNA) and conventional light microscopy (Morphology) hits.

| Growth form | Above-family | Family         | Above-genus                                     | Genus                 | Above-species | Species                         | Morphology | eDNA |
|-------------|--------------|----------------|-------------------------------------------------|-----------------------|---------------|---------------------------------|------------|------|
| Herbs       |              | Asteraceae     |                                                 | <i>Taraxacum</i><br>* |               |                                 |            | v    |
|             |              | Asteraceae     |                                                 |                       |               |                                 | v          | v    |
|             |              | Fabaceae       |                                                 |                       |               | <i>Pisum sativum</i>            |            | v    |
|             |              | Fabaceae       |                                                 |                       |               | <i>Trigonella caerulea</i>      |            | v    |
|             |              | Fabaceae       |                                                 |                       |               | <i>Vicia cracca</i>             |            | v    |
|             |              | Poaceae        | Festuca rubra/Trisetum spicatum/others          |                       |               |                                 |            | v    |
|             |              | Poaceae        |                                                 |                       |               | <i>Elymus caninus/E. repens</i> |            | v    |
|             |              | Poaceae        |                                                 |                       |               | <i>Agrostis capillaris</i>      |            | v    |
|             |              | Poaceae        |                                                 |                       |               | <i>Poa annua</i>                |            | v    |
|             |              | Poaceae        |                                                 |                       |               | <i>Poa badensis</i>             |            | v    |
|             |              | Poaceae        |                                                 |                       |               | <i>Poa pratensis</i>            |            | v    |
|             |              | Poaceae        |                                                 |                       |               | <i>Setaria verticillata</i>     |            | v    |
|             |              | Poaceae        |                                                 |                       |               |                                 | v          | v    |
|             |              | Urticaceae     |                                                 |                       |               |                                 | v          | v    |
|             |              | Fabaceae       |                                                 |                       |               |                                 |            | v    |
| Shrubs      |              | Araliaceae     |                                                 |                       |               | <i>Hedera helix</i>             |            | v    |
|             |              | Boraginaceae   |                                                 |                       |               | <i>Eritrichium nanum</i>        |            | v    |
|             |              | Caprifoliaceae |                                                 | <i>Lonicera</i> *     |               |                                 |            | v    |
|             |              | Pinaceae       |                                                 |                       |               | <i>Pinus mugo</i>               |            | v    |
|             |              | Rosaceae       |                                                 |                       |               | <i>Rubus caesius</i>            |            | v    |
| Trees       |              | Betulaceae     | <i>Carpinus betulus/Corylus avellana/Ostrya</i> |                       |               |                                 |            | v    |

|  |  |              |                                                                                                    |                       |  |                                |   |
|--|--|--------------|----------------------------------------------------------------------------------------------------|-----------------------|--|--------------------------------|---|
|  |  |              | <i>carpinifolia</i>                                                                                |                       |  |                                |   |
|  |  | Betulaceae   |                                                                                                    | <i>Alnus</i> sp.      |  |                                | v |
|  |  | Betulaceae   |                                                                                                    |                       |  | <i>Betula pendula</i>          | v |
|  |  | Betulaceae   |                                                                                                    | <i>Betula</i> sp.     |  |                                | v |
|  |  | Betulaceae   |                                                                                                    |                       |  | <i>Alnus viridis</i>           | v |
|  |  | Betulaceae   |                                                                                                    |                       |  | <i>Carpinus betulus</i>        | v |
|  |  | Fagaceae     | <i>Quercus ilex</i> T.                                                                             |                       |  |                                | v |
|  |  | Fagaceae     | <i>Quercus robur</i> T.                                                                            |                       |  |                                | v |
|  |  | Fagaceae     |                                                                                                    | <i>Fagus</i> sp.      |  |                                | v |
|  |  | Fagaceae     |                                                                                                    |                       |  | <i>Castanea sativa</i>         | v |
|  |  | Fagaceae     |                                                                                                    |                       |  |                                | v |
|  |  | Juglandaceae |                                                                                                    | <i>Juglans</i> sp.    |  |                                | v |
|  |  | Juglandaceae |                                                                                                    |                       |  | <i>Juglans regia</i>           | v |
|  |  | Malvaceae    |                                                                                                    | <i>Tilia</i> sp.      |  |                                | v |
|  |  | Moraceae     |                                                                                                    |                       |  | <i>Broussonetia papyrifera</i> | v |
|  |  | Myrtaceae    |                                                                                                    | <i>Eucalyptus</i> sp. |  |                                | v |
|  |  | Oleaceae     | <i>Fraxinus excelsior</i> /<br><i>F. ornus</i> / <i>Olea europaea</i> /<br><i>Syringa vulgaris</i> |                       |  |                                | v |
|  |  | Oleaceae     |                                                                                                    | <i>Olea</i> sp.       |  |                                | v |
|  |  | Oleaceae     |                                                                                                    |                       |  | <i>Fraxinus excelsior</i>      | v |
|  |  | Oleaceae     |                                                                                                    |                       |  | <i>Fraxinus ornus</i>          | v |
|  |  | Pinaceae     |                                                                                                    | <i>Abies</i> sp.      |  |                                | v |
|  |  | Pinaceae     |                                                                                                    | <i>Larix</i> sp.      |  |                                | v |
|  |  | Pinaceae     |                                                                                                    | <i>Picea</i> sp.      |  |                                | v |
|  |  | Pinaceae     |                                                                                                    |                       |  | <i>Larix decidua</i>           | v |
|  |  | Pinaceae     |                                                                                                    |                       |  | <i>Picea abies</i>             | v |
|  |  | Pinaceae     |                                                                                                    |                       |  | <i>Pinus cembra</i>            | v |
|  |  | Pinaceae     |                                                                                                    |                       |  |                                | v |

|  |                       |            |  |                    |  |                             |   |   |
|--|-----------------------|------------|--|--------------------|--|-----------------------------|---|---|
|  |                       | Salicaceae |  | <i>Populus</i> sp. |  |                             | v |   |
|  |                       | Ulmaceae   |  | <i>Ulmus</i> sp.   |  |                             | v |   |
|  |                       | Ulmaceae   |  |                    |  | <i>Ulmus glabra</i>         |   | v |
|  | Cupressaceae/Taxaceae |            |  |                    |  |                             | v |   |
|  |                       | Betulaceae |  |                    |  |                             |   | v |
|  |                       | Fabaceae   |  |                    |  | <i>Laburnum anagyroides</i> |   | v |
|  |                       | Oleaceae   |  |                    |  |                             | v |   |
|  |                       | Rosaceae   |  |                    |  | <i>Prunus armeniaca</i>     |   | v |
|  |                       | Rosaceae   |  |                    |  |                             |   | v |

\*Deposited sequence could not be verified by GeneBank, because it lacks annotation.

**Supplementary Figure S1.** OTU accumulation curves for each of the six samples, expressed as the number of OTUs by the number of reads from sequencing.

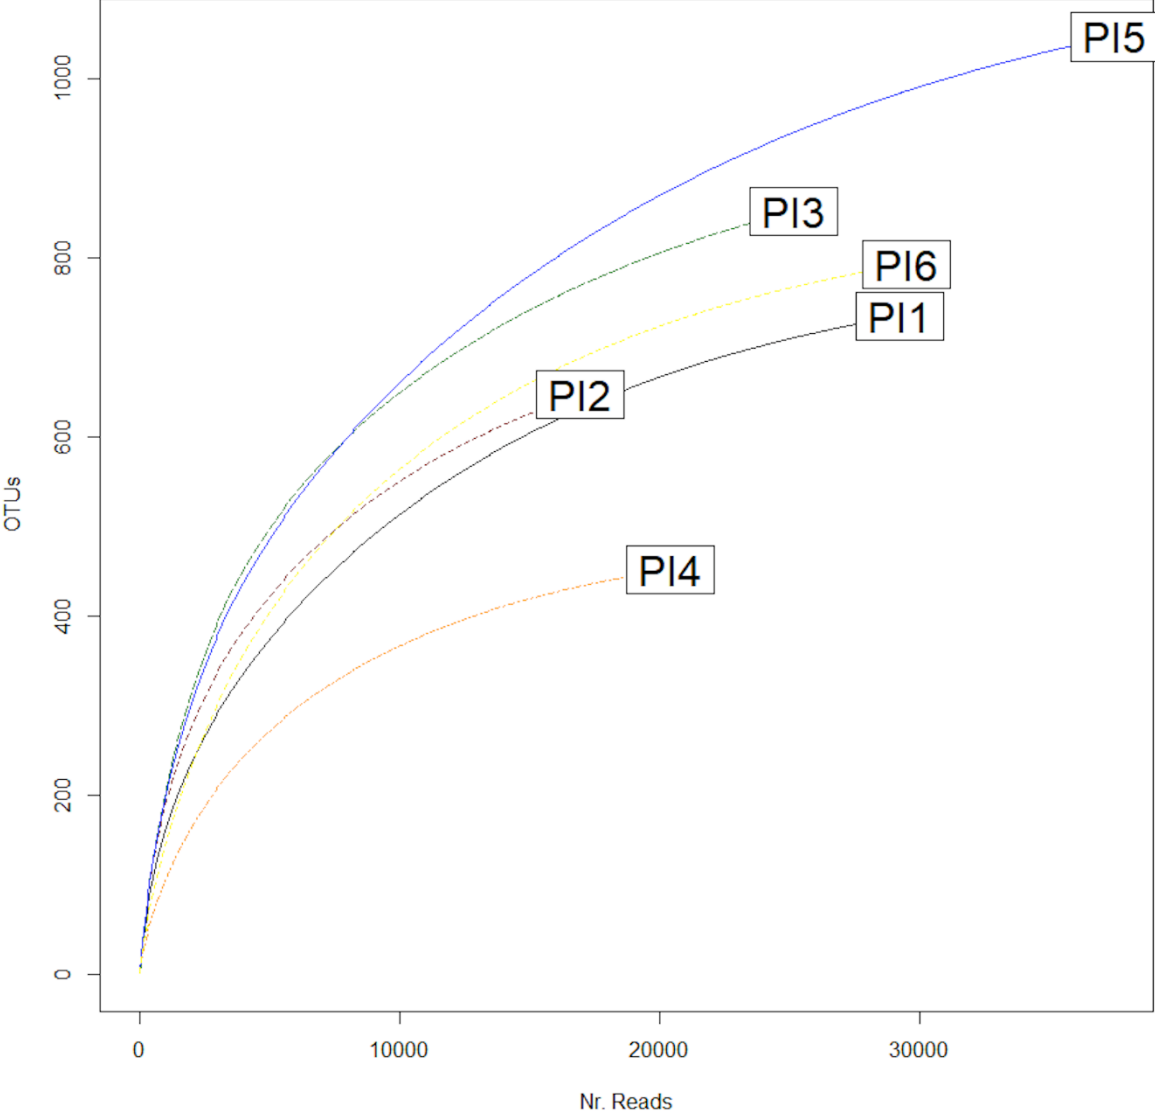

Supplement: 41598_2020_79738_MOESM1_ESM.pdf [file 41598_2020_79738_MOESM1_ESM.pdf]
